# Supplementary material
Source: PubMed Central journal article supplement (PMC6443251)
Supplement: NIHMS1503366-supplement-2.pdf [file NIHMS1503366-supplement-2.pdf]

## Supplementary Table 1. Primers for qPCR.

## qPCR primers

| Target       | Forward primer          | Reverse primer            |
|--------------|-------------------------|---------------------------|
| CD3          | CACTCTGGGCTTGCTGATGG    | TCATAGTCTGGGTTGGAACAGG    |
| CD8          | GCTGGTAGTCTGCATCCTGCTTC | TTGCTAGCAGGCTATCAGTGTTGTG |
| IFN $\gamma$ | GAGCTCATTGAATGCTTGGC    | GCGTCATTGAATCACACCTG      |
| PD-1         | CGTCCCTCAGTCAAGAGGAG    | GTCCCTAGAAGTGCCCAACA      |
| GAPDH        | AAGCTCACTGGCATGGCCTTC   | TGCTTCACCACCTTCTTGATGTC   |

|                | <b>Control</b>                    | <b>10<math>\times</math> mAb block</b> |                |
|----------------|-----------------------------------|----------------------------------------|----------------|
|                | <b>Mean <math>\pm</math> S.D.</b> | <b>Mean <math>\pm</math> S.D.</b>      | <b>p-value</b> |
| <b>Spleen</b>  | 20.04 $\pm$ 12.20                 | 1.88 $\pm$ 2.74                        | 0.0061         |
| <b>Blood</b>   | 0.67 $\pm$ 0.69                   | 19.46 $\pm$ 12.69                      | 0.0043         |
| <b>Heart</b>   | 0.30 $\pm$ 0.04                   | 10.57 $\pm$ 8.91                       | 0.2956         |
| <b>Liver</b>   | 9.77 $\pm$ 9.12                   | 11.69 $\pm$ 9.82                       | 0.9999         |
| <b>Kidneys</b> | 3.93 $\pm$ 0.60                   | 10.64 $\pm$ 7.18                       | 0.7755         |
| <b>Bone</b>    | 4.19 $\pm$ 1.18                   | 1.01 $\pm$ 0.94                        | 0.9951         |
| <b>Muscle</b>  | 0.73 $\pm$ 0.65                   | 1.08 $\pm$ 1.23                        | >0.9999        |
